# Supplementary material for: Peptide: MHC-based DNA vaccination strategy to activate natural killer cells by targeting killer cell immunoglobulin-like receptors
Source: J Immunother Cancer. 2021 May 20;9(5):e001912. doi: 10.1136/jitc-2020-001912 (PMC8141441; doi:10.1136/jitc-2020-001912)
Supplement: Supplementary data [file jitc-2020-001912supp002.xlsx]

## Sheet: Sheet1
Genes with FDR<0.05 comparing 2DS2-postive NK cells from mice injected with eith C*0102-AAA or C*01012-IVDL
genes	AAA_1_S2pos	AAA_2_S2pos	AAA_3_S2pos	AAA_4_S2pos	IVDL_1_S2pos	IVDL_2_S2pos	IVDL_3_S2pos	IVDL_4_S2pos	logFC	logCPM	LR	PValue	FDR	de	sig
Insc	6.09422	7.61777	60.9422	121.884	0	3.38568	6.41497	4.68786	-3.31043	4.52633	12.5617	0.000393737	0.0754592	-1	1
Tstd3	12.1884	22.8533	17.4121	24.3769	5.5402	0	1.60374	2.34393	-2.93167	3.87032	13.5137	0.000236827	0.0494255	-1	1
A530053G22Rik	127.979	38.0889	130.59	146.261	11.0804	10.157	20.8486	21.0954	-2.63963	5.82683	34.1927	4.99157e-09	1.04534e-05	-1	1
Jazf1	24.3769	15.2355	17.4121	36.5653	0	6.77135	1.60374	4.68786	-2.59493	4.07202	12.4753	0.000412362	0.076949	-1	1
Palld	152.355	68.56	339.535	134.073	27.701	33.8568	35.2823	30.4711	-2.40485	6.54713	31.6839	1.81416e-08	2.01439e-05	-1	1
Gm49457	115.79	76.1777	121.884	146.261	0	37.2424	25.6599	21.0954	-2.26584	5.9672	33.8684	5.89674e-09	1.04534e-05	-1	1
9330185C12Rik	225.486	91.4133	121.884	73.1306	22.1608	30.4711	25.6599	32.815	-2.22508	6.24206	31.9658	1.5691e-08	2.01439e-05	-1	1
Foxj2	54.848	30.4711	52.2362	36.5653	16.6206	3.38568	8.01871	11.7196	-2.20338	4.82199	16.9013	3.93755e-05	0.0182773	-1	1
Gm15785	30.4711	45.7066	43.5301	36.5653	0	6.77135	14.4337	4.68786	-2.20095	4.65762	13.7132	0.000212957	0.0494255	-1	1
Dbx2	140.167	15.2355	78.3542	170.638	27.701	13.5427	17.6412	28.1272	-2.18912	5.80969	16.8134	4.12406e-05	0.0182773	-1	1
Epb41l4a	207.203	198.062	278.593	48.7537	22.1608	44.0138	36.8861	58.5982	-2.15415	6.75006	31.5057	1.98853e-08	2.01439e-05	-1	1
Mir6236	365.653	373.271	679.07	402.218	138.505	40.6281	97.8282	133.604	-2.15237	8.04272	50.1347	1.43548e-12	1.0179e-08	-1	1
Plcz1	42.6595	45.7066	60.9422	48.7537	0	10.157	19.2449	14.0636	-1.85948	5.00875	13.756	0.000208159	0.0494255	-1	1
Esrrg	365.653	190.444	409.183	268.146	55.402	101.57	78.5833	103.133	-1.83494	7.55675	46.9652	7.22576e-12	2.56189e-08	-1	1
Vmn2r84	170.638	198.062	365.653	73.1306	38.7814	37.2424	75.3759	70.3179	-1.81326	6.96018	22.2889	2.34558e-06	0.00166325	-1	1
Spata5	274.24	83.7955	252.475	170.638	49.8618	77.8706	65.7534	53.9104	-1.652	6.95804	24.2451	8.48247e-07	0.000668325	-1	1
mt-Tv	73.1306	53.3244	52.2362	73.1306	0	33.8568	17.6412	25.7832	-1.57219	5.41618	12.0062	0.000530239	0.0917055	-1	1
Irak2	164.544	83.7955	130.59	134.073	60.9422	20.3141	51.3197	44.5347	-1.54149	6.38823	20.2509	6.79218e-06	0.00401361	-1	1
Ptprj	73.1306	121.884	87.0603	60.9422	11.0804	47.3995	30.4711	30.4711	-1.46452	5.87576	14.6595	0.000128782	0.0397039	-1	1
Hexb	152.355	99.031	322.123	243.769	77.5628	88.0276	86.602	82.0375	-1.24121	7.11058	15.9151	6.62465e-05	0.0260974	-1	1
Yaf2	121.884	144.738	87.0603	60.9422	55.402	60.9422	46.5085	28.1272	-1.21372	6.26901	12.0426	0.00051997	0.0917055	-1	1
Cdyl	140.167	129.502	148.002	146.261	49.8618	88.0276	73.7721	53.9104	-1.04747	6.69336	13.8546	0.000197515	0.0494255	-1	1
Gm42418	45572.6	35117.9	43556.2	57614.7	21767.4	30853.7	23411.4	18896.8	-0.937764	15.078	13.5035	0.00023812	0.0494255	-1	1
CT010467.1	2608.33	2826.19	3099.35	3205.56	2116.36	1939.99	1975.81	1858.74	-0.570488	11.2593	20.7136	5.33363e-06	0.00343825	-1	1
Rpl18-ps1	396.124	243.769	426.595	268.146	504.158	599.265	508.386	585.982	0.70207	8.84333	13.5527	0.000231963	0.0494255	1	1
Supt16	201.109	213.298	208.945	158.45	243.769	358.882	370.464	365.653	0.783455	8.14841	14.1166	0.000171822	0.0468611	1	1
Snord15b	237.675	182.827	191.533	134.073	337.952	399.51	274.24	349.246	0.809278	8.13413	13.7814	0.000205357	0.0494255	1	1
Rbms1	85.3191	83.7955	113.178	146.261	227.148	155.741	224.524	196.89	0.966681	7.39897	13.4581	0.000243956	0.0494255	1	1
Gm14513	146.261	137.12	130.59	60.9422	271.47	281.011	213.298	257.832	1.01717	7.68482	18.189	2.00028e-05	0.0101314	1	1
Rpgrip1	176.732	144.738	104.472	121.884	210.528	220.069	344.804	344.558	1.0271	7.84391	15.4485	8.47855e-05	0.0316428	1	1
Vti1b	79.2248	45.7066	95.7663	48.7537	132.965	189.598	128.299	192.202	1.22329	7.04203	14.9594	0.000109849	0.0370922	1	1
Vim	109.696	114.267	130.59	60.9422	199.447	281.011	259.806	283.616	1.27511	7.6539	27.5961	1.49482e-07	0.000132497	1	1
Srrm1	73.1306	76.1777	52.2362	48.7537	99.7236	226.84	165.185	152.355	1.33705	7.0374	16.3421	5.28753e-05	0.0220552	1	1
Fbxo11	42.6595	22.8533	52.2362	12.1884	110.804	60.9422	88.2058	98.4451	1.35747	6.25619	11.9302	0.000552314	0.093249	1	1
Ccser2	30.4711	15.2355	17.4121	24.3769	88.6432	91.4133	72.1684	42.1907	1.66431	5.94918	12.0971	0.000505004	0.0917055	1	1
4930470G03Rik	18.2827	38.0889	17.4121	12.1884	66.4824	77.8706	81.7908	98.4451	1.87288	6.10077	19.8993	8.16292e-06	0.00445256	1	1
Itih5	6.09422	7.61777	43.5301	12.1884	38.7814	60.9422	76.9796	60.9422	1.88857	5.76094	13.5686	0.000230001	0.0494255	1	1
Pdcd5-ps	18.2827	15.2355	8.70603	12.1884	55.402	74.4849	48.1122	56.2543	1.98196	5.66119	15.1987	9.67676e-05	0.034309	1	1
Cops8	12.1884	7.61777	26.1181	24.3769	127.425	50.7851	62.5459	51.5665	2.04499	5.8582	14.1176	0.000171733	0.0468611	1	1
Neurl3	6.09422	30.4711	17.4121	12.1884	116.344	88.0276	38.4898	53.9104	2.07288	5.85298	13.0043	0.000310769	0.0612128	1	1
Hmg20b	6.09422	7.61777	0	0	33.2412	40.6281	25.6599	39.8468	2.93246	5.01974	14.8243	0.000118002	0.0380342	1	1
Extl3	0	0	8.70603	0	16.6206	30.4711	25.6599	30.4711	3.4277	4.75254	14.5533	0.000136251	0.0402565	1	1
